# Supplementary material for: Fast Chromatographic Determination of Free Amino Acids in Bee Pollen
Source: MDPI journal article supplement (doi:10.3390/foods11244013), 2022-12-12
Supplement: s1 [file s1]

# Supplementary Material

## Fast chromatographic determination of free amino acids in bee pollen

**Beatriz Martín-Gómez <sup>1</sup>, Laura Salahange <sup>1</sup>, Jesús A. Tapia <sup>1,2</sup>, María T. Martín <sup>1</sup>, Ana M. Ares <sup>1</sup>, and José Bernal <sup>1,\*</sup>**

<sup>1</sup> Analytical Chemistry Group (TESEA), I. U. CINQUIMA, Faculty of Sciences, University of Valladolid, 47011 Valladolid, Spain

<sup>2</sup> Department of Statistics and Operations Research, Faculty of Sciences, University of Valladolid, 47011 Valladolid, Spain

\* Correspondence: jose.bernal@uva.es (J.B.); Tel.: +34-983186347; <https://tesea.uva.es/>

**Table S1.** Summary of trueness studies for some of the studied amino acids.

| Amino acid | GC-MS                  |              |             | HPLC-MS                |             |             |
|------------|------------------------|--------------|-------------|------------------------|-------------|-------------|
|            | Mean (%) $\pm$ RSD (%) |              |             | Mean (%) $\pm$ RSD (%) |             |             |
|            | Low                    | Medium       | High        | Low                    | Medium      | High        |
| <b>ALA</b> | 99 $\pm$ 8             | 103 $\pm$ 13 | 100 $\pm$ 7 | 95 $\pm$ 10            | 98 $\pm$ 7  | 102 $\pm$ 8 |
| <b>GLU</b> | 92 $\pm$ 12            | 95 $\pm$ 8   | 87 $\pm$ 10 | 90 $\pm$ 8             | 97 $\pm$ 14 | 95 $\pm$ 11 |
| <b>LEU</b> | 102 $\pm$ 8            | 97 $\pm$ 4   | 99 $\pm$ 7  | 98 $\pm$ 6             | 104 $\pm$ 4 | 99 $\pm$ 8  |
| <b>PRO</b> | 91 $\pm$ 7             | 94 $\pm$ 9   | 96 $\pm$ 6  | 94 $\pm$ 12            | 92 $\pm$ 3  | 95 $\pm$ 7  |
| <b>TRP</b> | 88 $\pm$ 11            | 86 $\pm$ 8   | 87 $\pm$ 5  | 92 $\pm$ 9             | 90 $\pm$ 3  | 93 $\pm$ 9  |
| <b>VAL</b> | 85 $\pm$ 5             | 88 $\pm$ 6   | 91 $\pm$ 2  | 90 $\pm$ 6             | 88 $\pm$ 10 | 85 $\pm$ 8  |

Low- LOQ (see Tables 1 and 2); Medium QC-50 nmol/mL; High QC-200 nmol/mL.

**Table S2..** Weights of the five principal components.

|             | <b>Prin1</b> | <b>Prin2</b> | <b>Prin3</b> | <b>Prin4</b> | <b>Prin5</b> |
|-------------|--------------|--------------|--------------|--------------|--------------|
| <b>ALA</b>  | 0.236057     | -0.036155    | 0.177358     | 0.311309     | 0.339895     |
| <b>GLY</b>  | 0.314397     | -0.031592    | 0.056109     | 0.055225     | 0.109943     |
| <b>VAL</b>  | 0.303928     | -0.100335    | -0.177942    | 0.012101     | 0.143828     |
| <b>LEU</b>  | 0.262050     | -0.263823    | 0.072527     | 0.183980     | 0.030612     |
| <b>ILE</b>  | 0.275516     | -0.206456    | -0.137586    | 0.141888     | -0.122005    |
| <b>THR</b>  | 0.309164     | -0.167850    | -0.006714    | -0.040024    | -0.074947    |
| <b>GABA</b> | 0.234345     | 0.165024     | 0.029122     | -0.362413    | 0.311457     |
| <b>SER</b>  | 0.214260     | -0.101585    | 0.284065     | -0.252636    | -0.336496    |
| <b>PRO</b>  | -0.251365    | -0.064490    | 0.285289     | -0.064884    | 0.361294     |
| <b>ASN</b>  | 0.169649     | 0.311969     | -0.063674    | -0.374812    | 0.189562     |
| <b>ASP</b>  | 0.184648     | 0.388299     | -0.047240    | 0.169538     | -0.101457    |
| <b>MET</b>  | 0.134758     | -0.079638    | 0.511498     | -0.185445    | -0.239149    |
| <b>HYP</b>  | -0.019473    | 0.314684     | 0.288880     | 0.132603     | -0.100750    |
| <b>GLU</b>  | 0.261909     | -0.186448    | -0.199916    | 0.174555     | -0.168466    |
| <b>PHE</b>  | 0.099522     | 0.383165     | 0.228584     | 0.298679     | -0.107669    |
| <b>GLN</b>  | 0.254724     | 0.078593     | -0.089529    | -0.401106    | 0.242718     |
| <b>LYS</b>  | 0.322003     | 0.106982     | -0.038615    | 0.068153     | -0.031016    |
| <b>HIS</b>  | 0.129948     | 0.428577     | 0.080410     | 0.175902     | -0.005519    |
| <b>TYR</b>  | 0.059226     | -0.220286    | 0.500309     | -0.098823    | -0.013847    |
| <b>TRP</b>  | 0.002956     | -0.143675    | 0.191574     | 0.312750     | 0.525214     |

**Table S3.** Eigenvalues of the correlation matrix.

| <b>Principal<br/>component</b> | <b>Eigenvalue</b> | <b>Difference</b> | <b>Proportion</b> | <b>Accumulated<br/>variability (%)</b> |
|--------------------------------|-------------------|-------------------|-------------------|----------------------------------------|
| <b>1</b>                       | 8.99183530        | 4.9626684         | 0.4496            | 44.96                                  |
| <b>2</b>                       | 4.0291669         | 1.7987107         | 0.2015            | 65.11                                  |
| <b>3</b>                       | 2.2304562         | 0.4620516         | 0.1115            | 76.26                                  |
| <b>4</b>                       | 1.7684046         | 0.4078791         | 0.0884            | 85.10                                  |
| <b>5</b>                       | 1.3605255         |                   | 0.0680            | 91.90                                  |

**Table S4.** Number of observations and percentage classified in each group using a quadratic discriminant analysis.

| Origin | AP     | COM    | Total  |
|--------|--------|--------|--------|
| AP     | 4      | 0      | 7      |
| %      | 100.00 | 0.00   | 100.00 |
| COM    | 0      | 8      | 8      |
| %      | 0.00   | 100.00 | 100.00 |
| Total  | 4      | 8      | 12     |
|        | 33.33  | 66.67  | 100.00 |

AP, samples from experimental apiaries; COM, commercial samples.

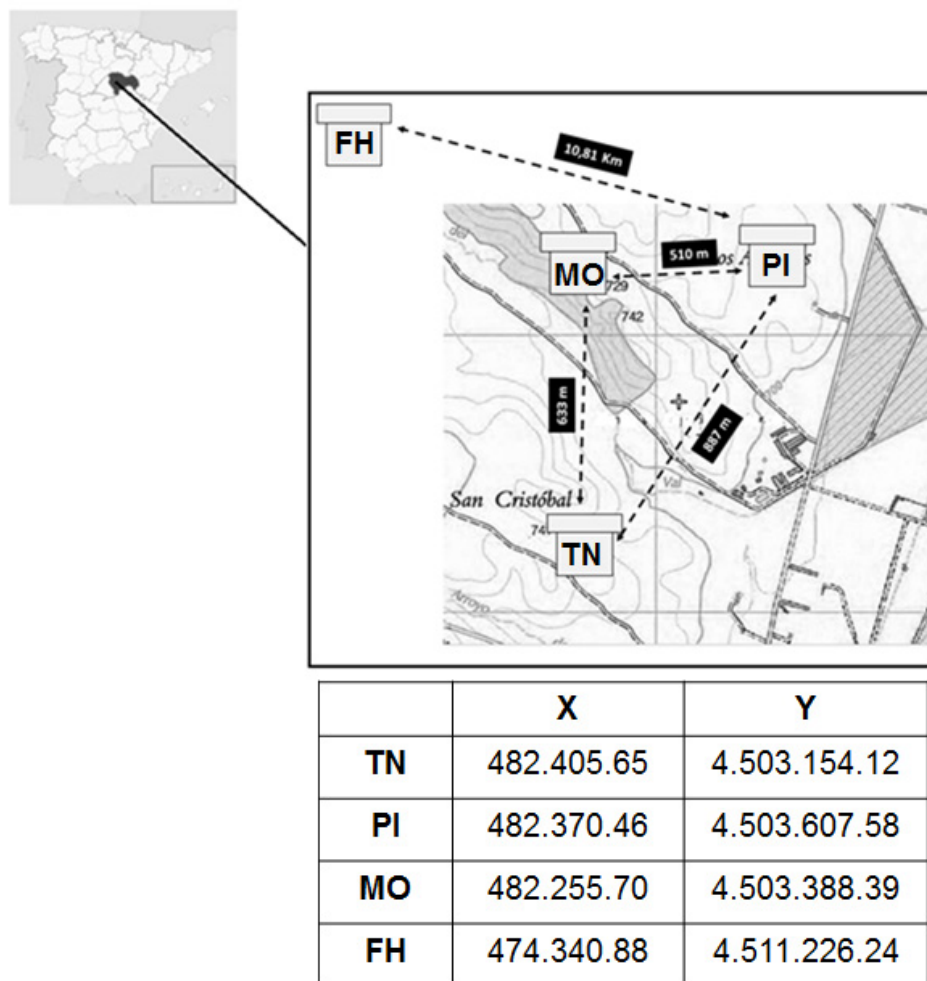

**Figure S1.-** Location and Global Positioning System (GPS) data of the apiaries (Fuentelahiguera, FH; Pistacho, PI; Monte, MO; Tio Natalio, TN). Adapted from Foods, 11, Ares, A. M., Tapia, J. A., González-Porto, A. V., Higes, M., Martín-Hernández, R, Bernal, J., Glucosinolates as markers of the origin and harvesting period for discrimination of bee pollen by UPLC-MS/MS, 1446, 2022, with permission from MDPI.

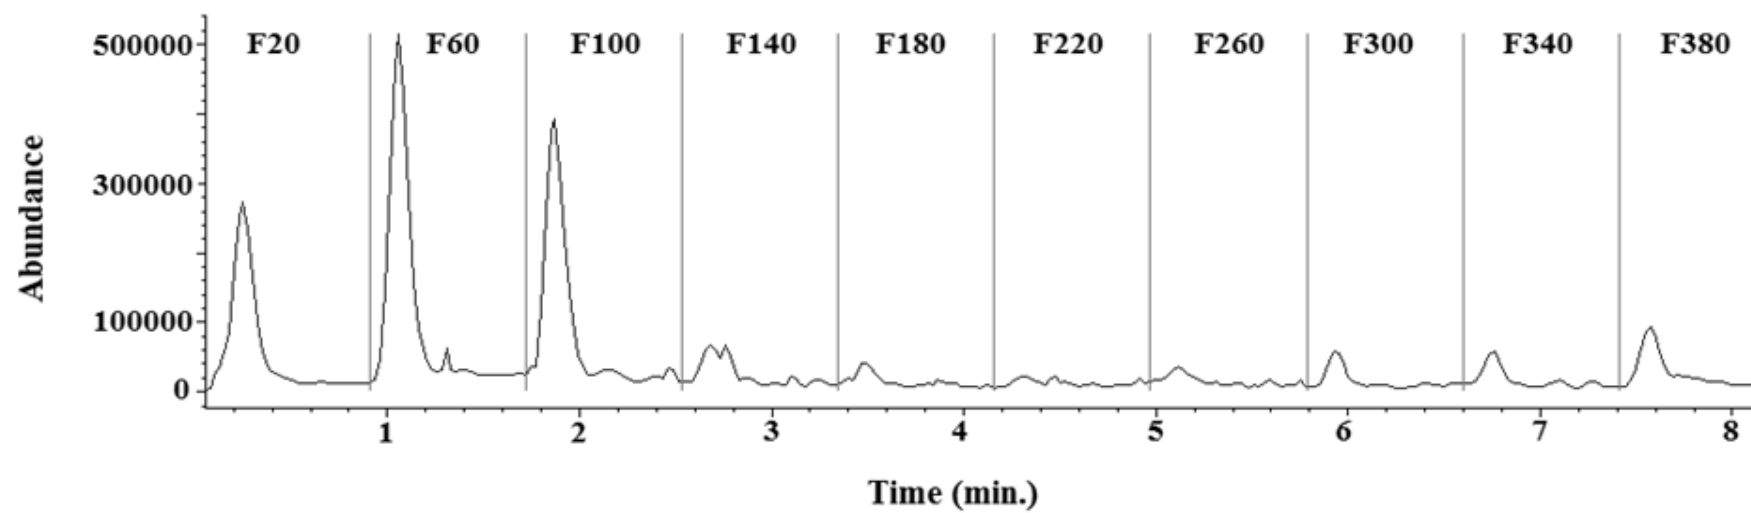

**Figure S2.** Results of the flow injection analysis of a GLN standard solution for optimizing the value of the fragmentor voltage (20-380V; F20-F380).

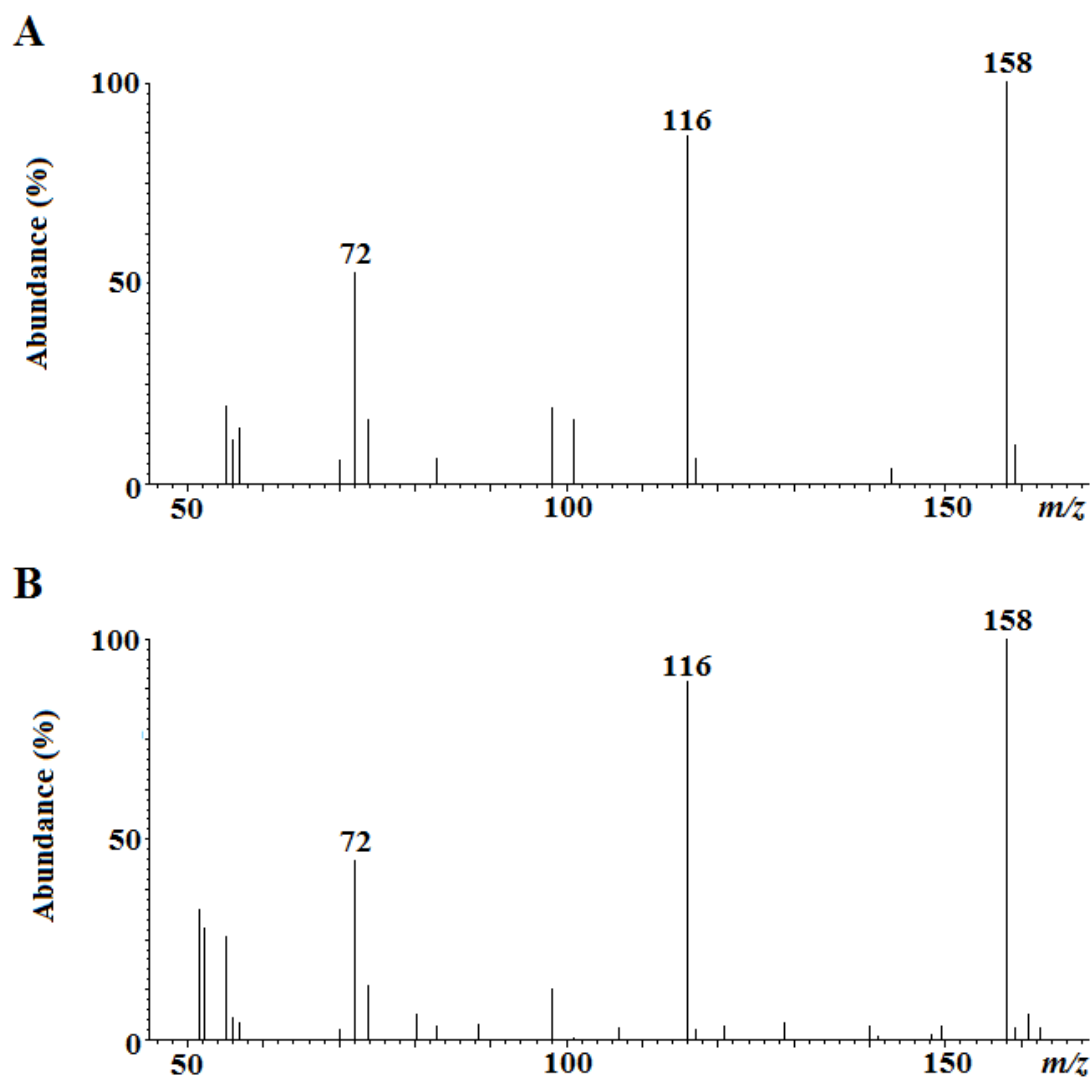

**Figure S3.** MS spectra of VAL in (A) solvent and (B) matrix-matched standards. The GC-MS conditions are summarized in subsection 2.4.1.



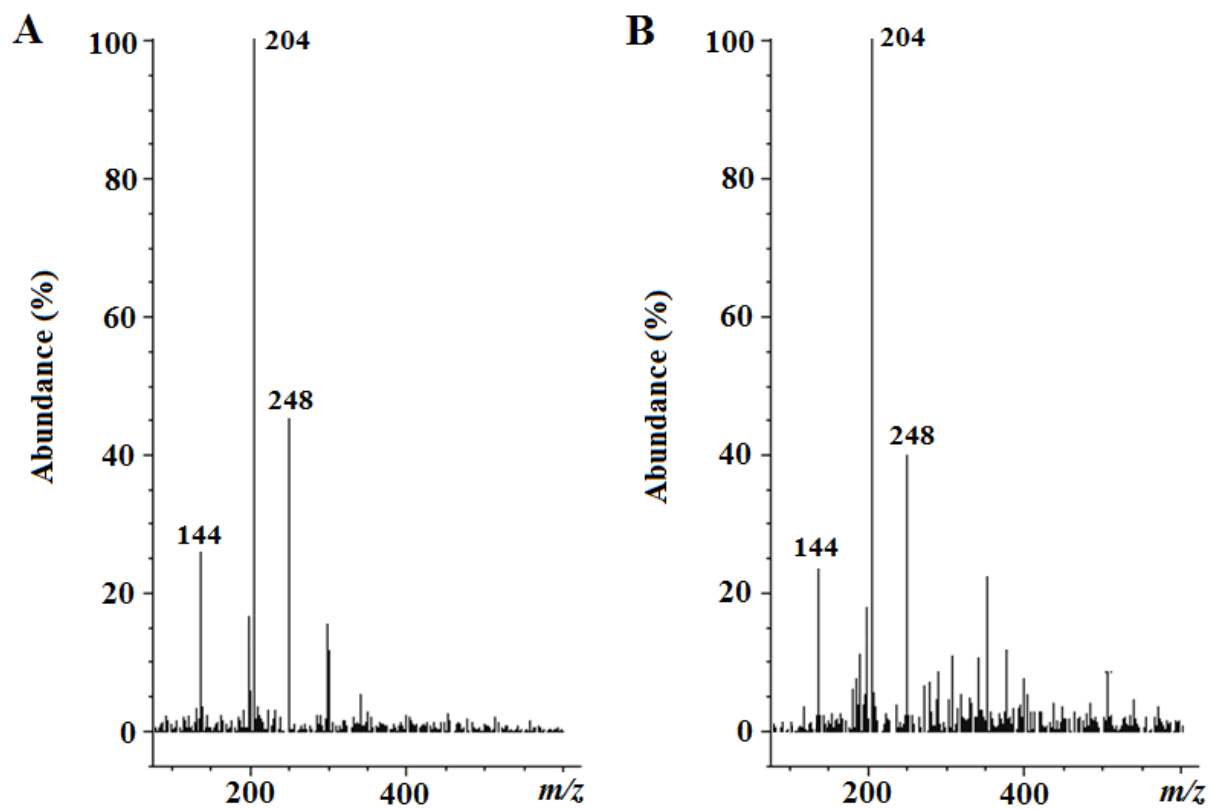

**Figure S4.** MS spectra of GLY in (A) solvent and (B) matrix-matched standards. The HPLC-MS conditions are summarized in subsection 2.4.2.
